# Supplementary material for: Autophagosomes form at ER–mitochondria contact sites
Source: Springer Nature journal article supplement (doi:10.1038/nature11910), 2013-03-01
Supplement: 41586_2013_BFnature11910_MOESM38_ESM.pdf [file 41586_2013_BFnature11910_MOESM38_ESM.pdf]

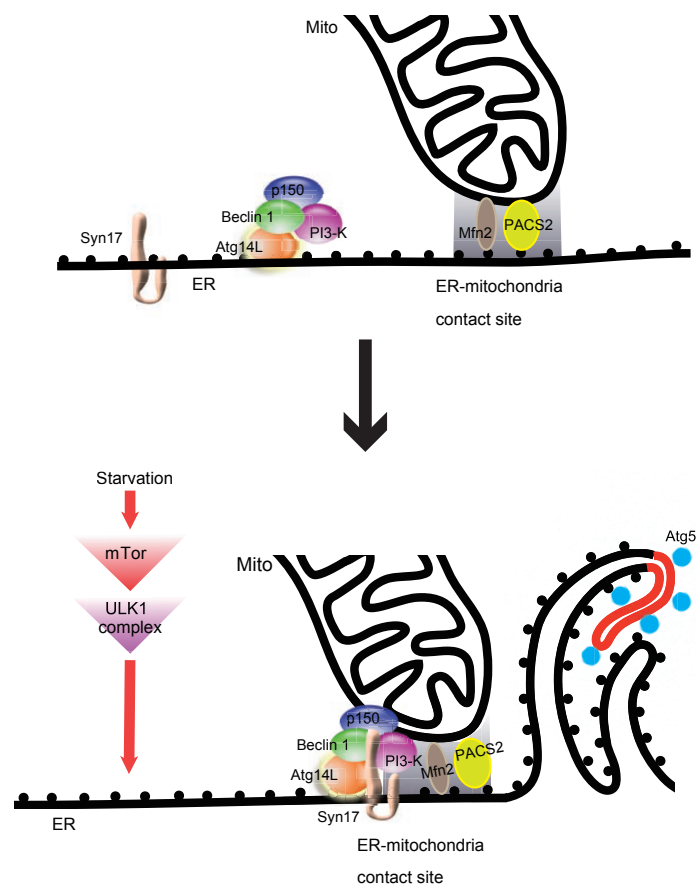

**Supplementary Figure 1 | Model of autophagosome formation at the ER-mitochondria contact site.**

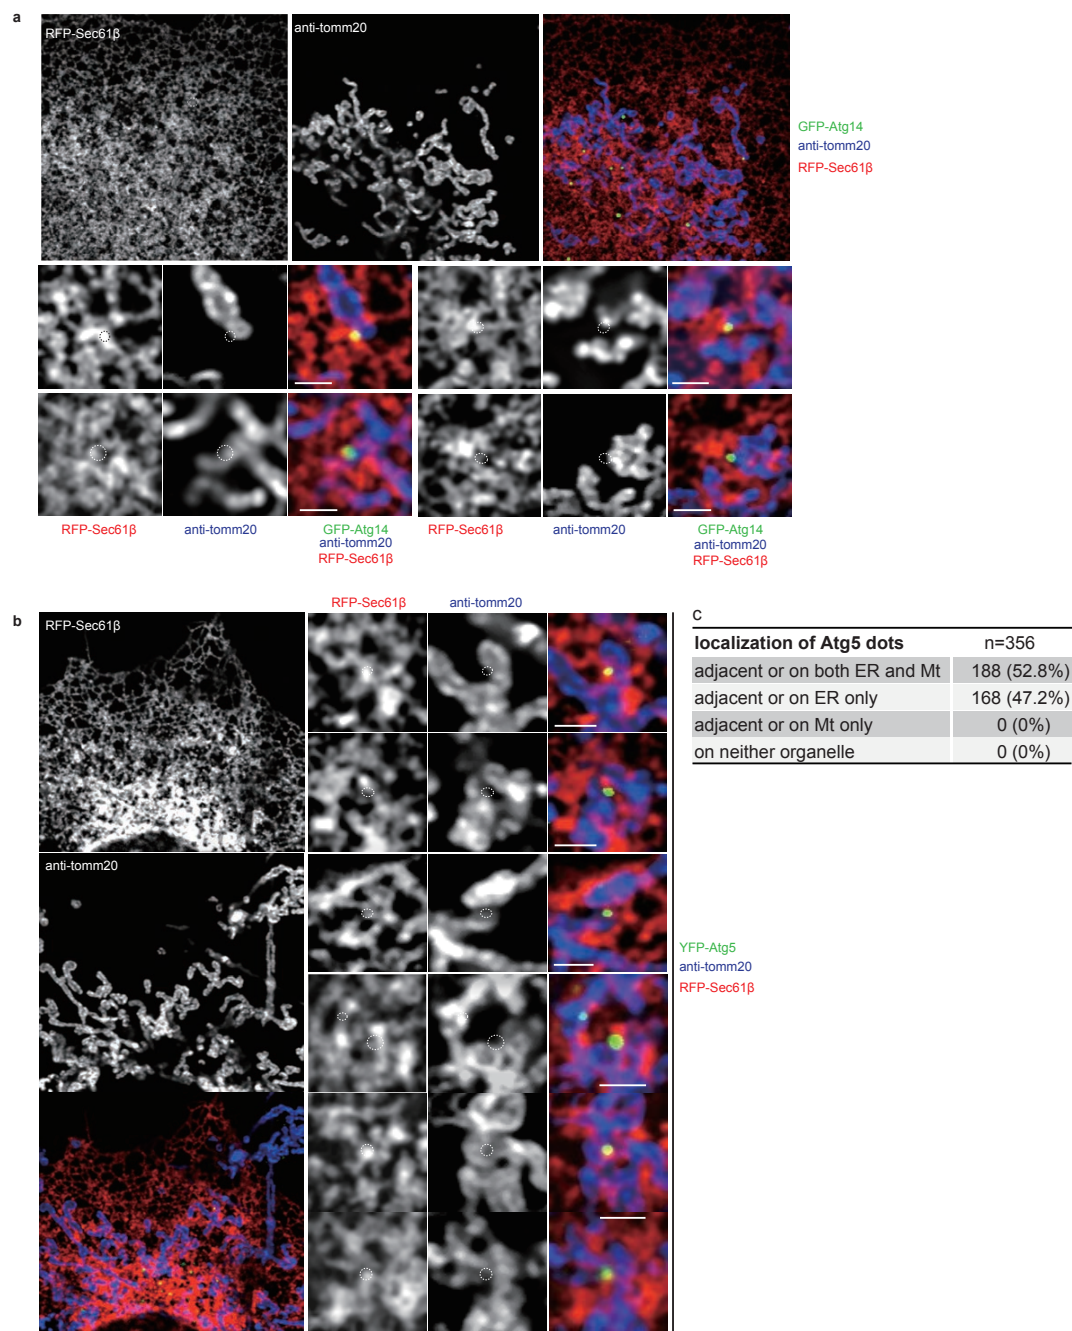

**Supplementary Figure 2 | Atg14 assembly and isolation membrane formation takes place at ER-mitochondria contact sites.** **a**, COS7 cells co-transfected with GFP-Atg14L and RFP-Sec61b were immunostained for TOMM20 (a mitochondria marker) under starved conditions (2 h). **b**, COS7 cells stably expressing YFP-Atg5 (an isolation membrane marker) were transfected with RFP-Sec61β (ER marker) and were immunostained for TOMM20 (a mitochondria marker) under starved conditions (2 h). Scale bars, 2 μm. **c**, Quantification of localizations of YFP-Atg5 dots shown in **b**.

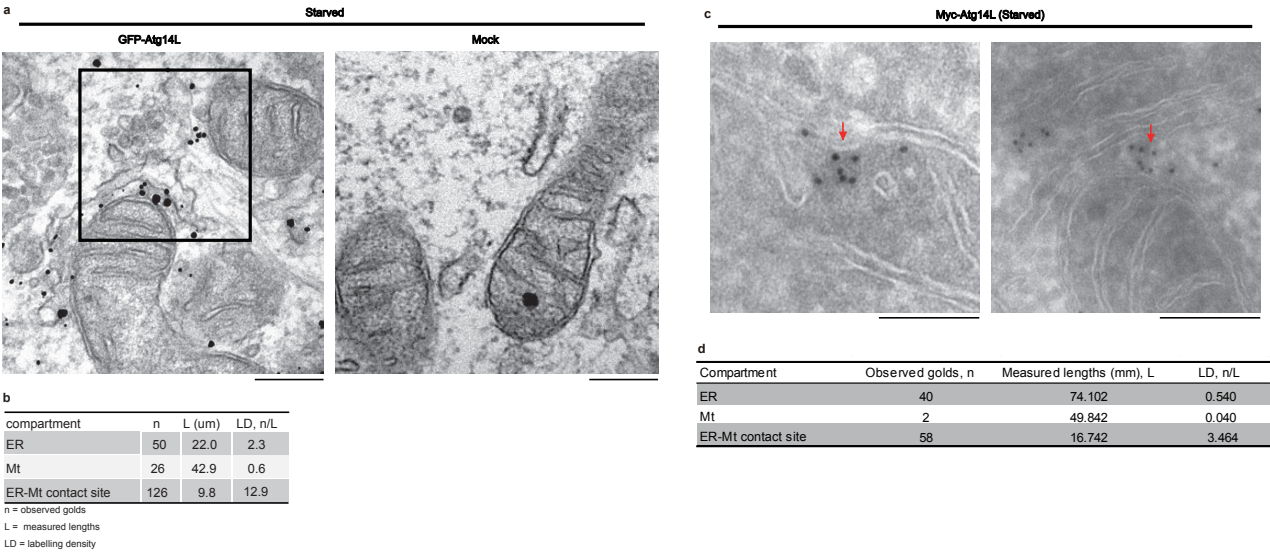

**Supplementary Figure 3 | Atg14L resides at ER-mitochondria contact site under starvation condition.** **a**, HeLa cells expressing GFP-Atg14L under starvation for 2 h were microscopically probed with anti-GFP antibodies. Red arrows indicate immunogold-labeled GFP-Atg14L. Box indicate the Figure 1b. Scale bar, 200 nm. **b**, Quantification of Figure 1c from 10 cells. **c**, HeLa cells were transfected with Myc-Atg14. After 24 h, the cells were starved for 2 h and analyzed microscopically using antibodies against Myc. Scale bars, 200 nm. **d**, Gold labeling of organelles of b. 15 sections were counted. LD, labelling density; Mt, Mitochondria.



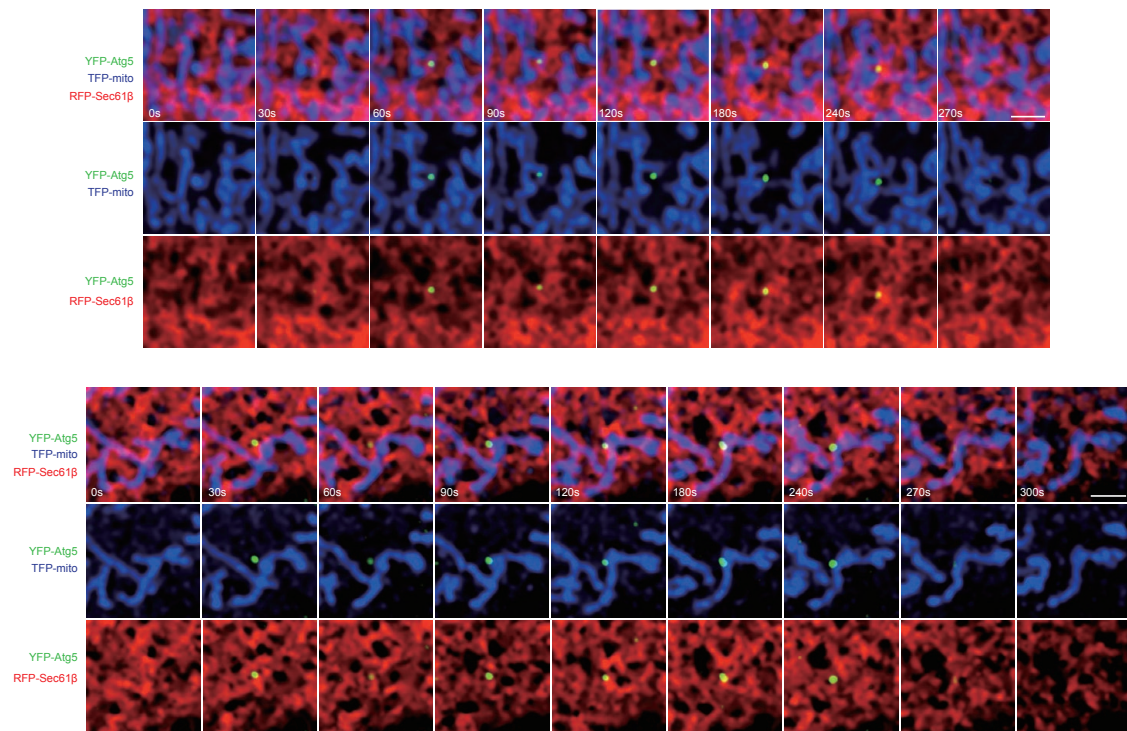

**Supplementary Figure 4 | Isolation membrane formation takes place at the ER-mitochondria contact site.** Time-lapse images of COS7 cells transfected with YFP-Atg5, RFP-Sec61 $\beta$  and TFP-mito under starved conditions. Images were taken after cells were starved for one hour. Three channels were observed simultaneously using three cameras. Scale bars, 2  $\mu$ m.

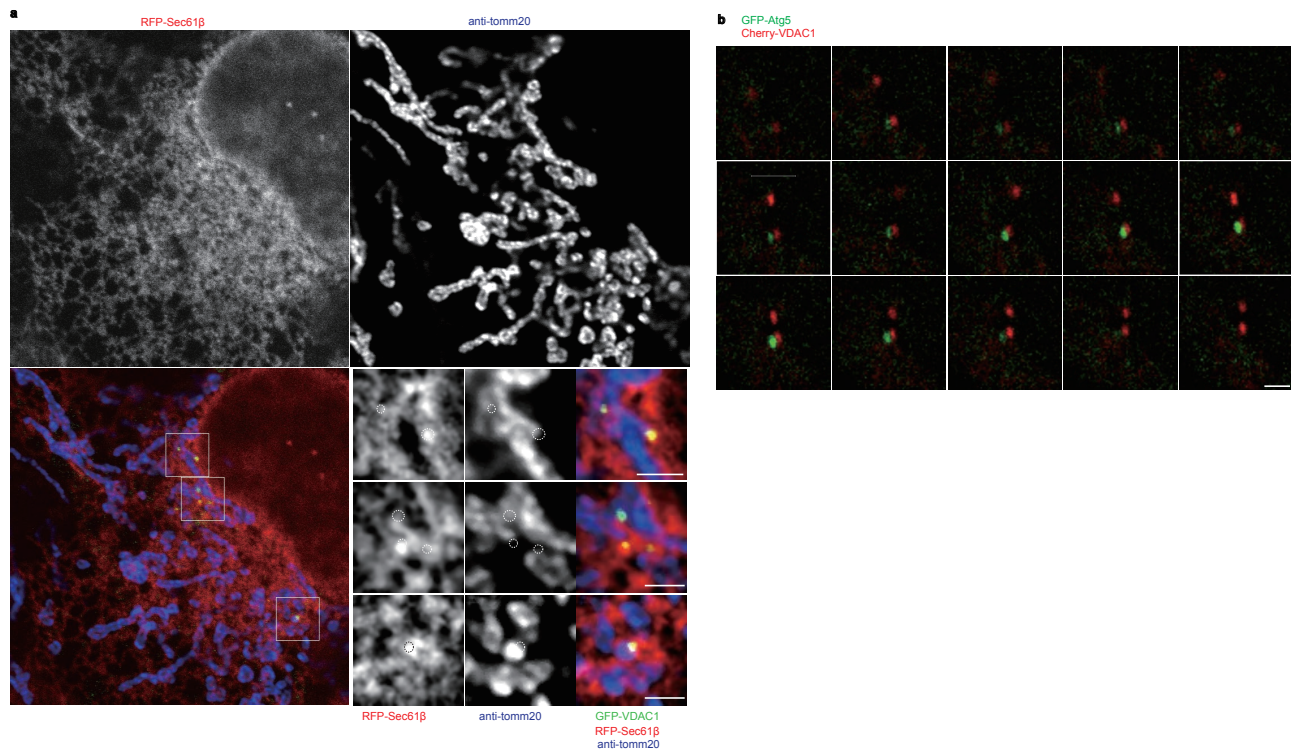

**Supplementary Figure 5 | GFP-Atg5 puncta tightly interact with the Cherry-VDAC1, a marker of the ER-mitochondria contact site.** **a**, Overexpressed Cherry-VDAC1 located at the ER-mitochondria contact site. COS7 cells transfected with GFP-VDAC1 and RFP-Sec61 $\beta$  were immunostained for TOMM20 (a mitochondria marker). **b**, Time-lapse images of HeLa cells stably expressing GFP-Atg5 and transiently expressing Cherry-VDAC1 under starved conditions. Live-cell images were taken after cells were incubated under the starved condition for 4.5 h; representative still frames are shown. Supplementary Figs 5b is frames from Supplementary movie 4. Scale bars, 2  $\mu$ m

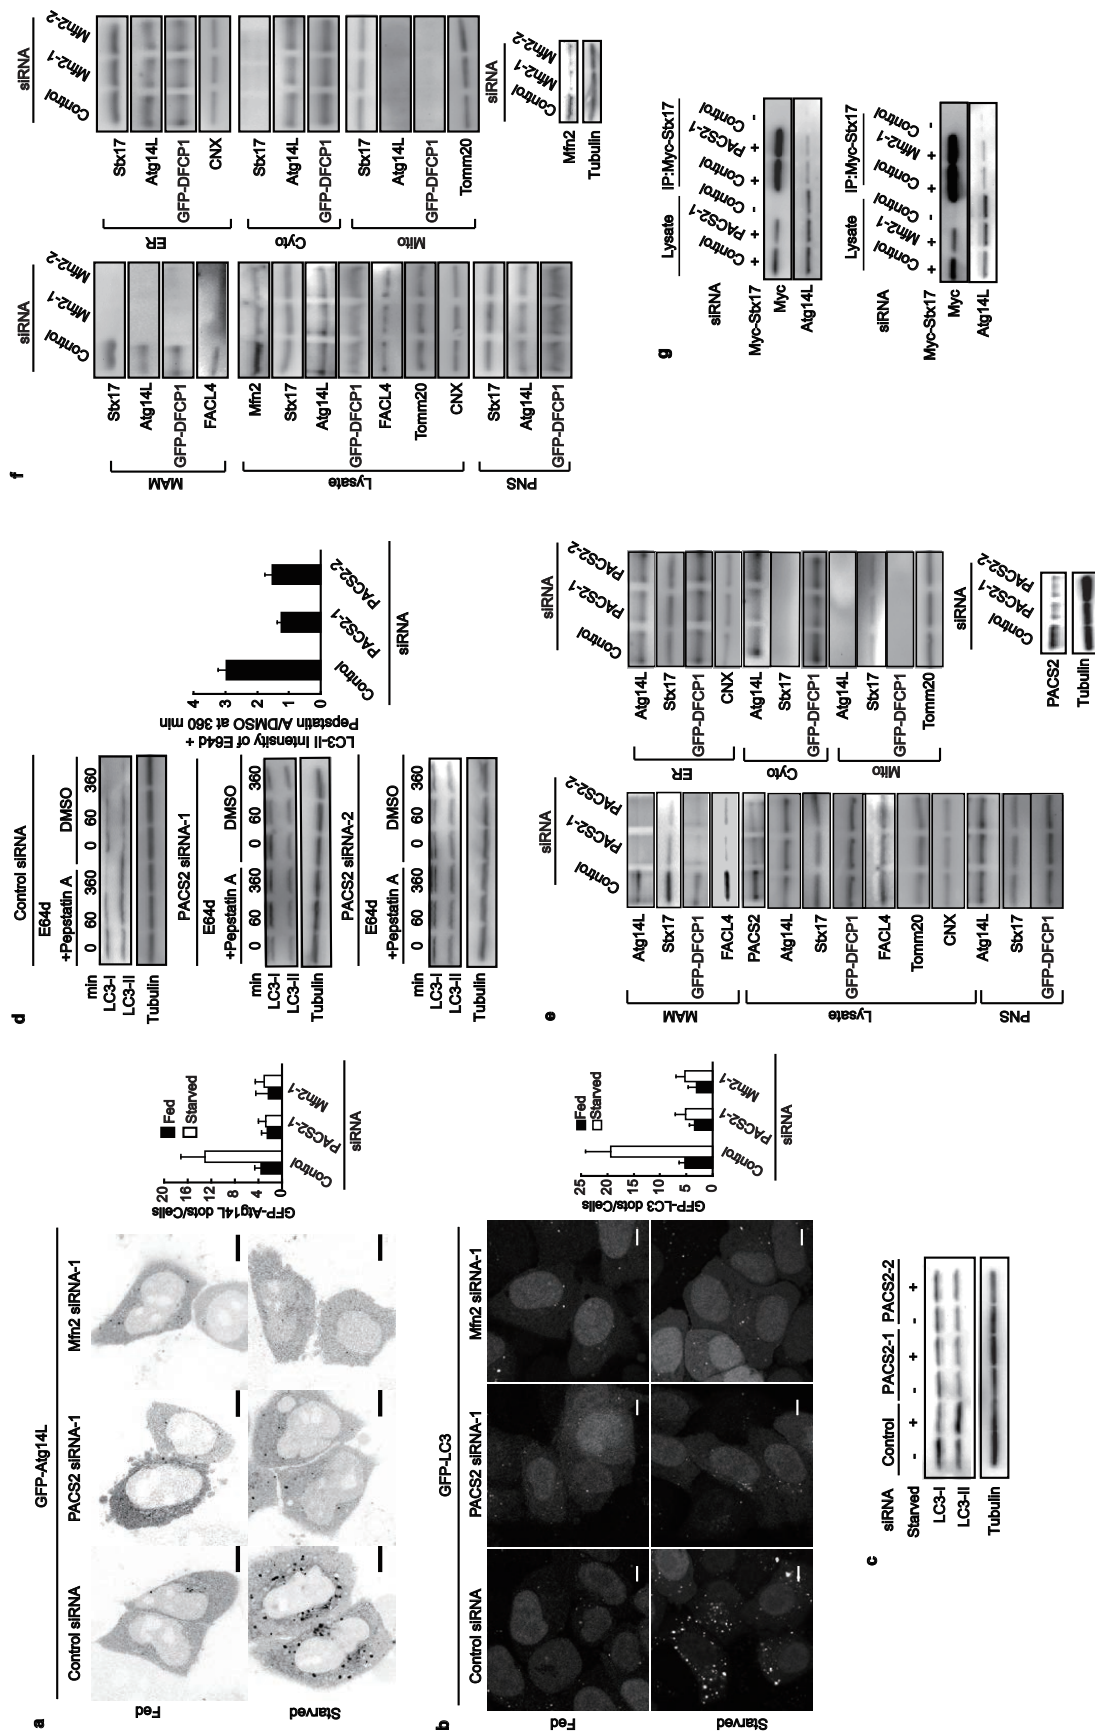

**Supplementary Figure 6 | PACS2 and Mfn2-knockdown inhibit formation of ER-mitochondria contact sites and puncta formation of GFP-Atg14L and GFP-LC3 in starved cells.**

**a**, HeLa cells expressing GFP-Atg14L were transfected with siRNA against PACS2 or Mfn2. Cells were subjected to fed or starved conditions for 2 h and observed. The number of GFP-Atg14L puncta were counted (n>20 cells). **b**, PACS2 or Mfn2-knockdown HeLa cells expressing GFP-LC3 were subjected to fed or starved conditions for 2 h and observed. The number of GFP-LC3 puncta were counted (n=20 cells). **c**, PACS2-knockdown HeLa cells were starved and subjected to immunoblotting using antibodies against LC3 and tubulin. **d**, PACS2-knockdown HeLa cells were starved with or without proteinase inhibitors for the indicated times (minutes). Cell lysates were probed with antibodies against LC3 and tubulin. LC3-II proteins were gradually degraded in the control, indicating autophagic flux; lysosomal protease inhibitors (E64d and pepstatin A) prevented this degradation, with negligible effects on LC3-I. No flux-related degradation was observed in PACS2-knockdown cells. HeLa cells were transfected with siRNA against **e**, PACS2 or **f**, Mfn2. After 48 h, the cells were lysed and subjected to immunoblotting using specific antibodies. **g**, PACS2 or Mfn2-knockdown HeLa cells expressing Myc-Stx17 were immunoprecipitated by myc-antibodies and immunostained by antibodies indicated on the left.

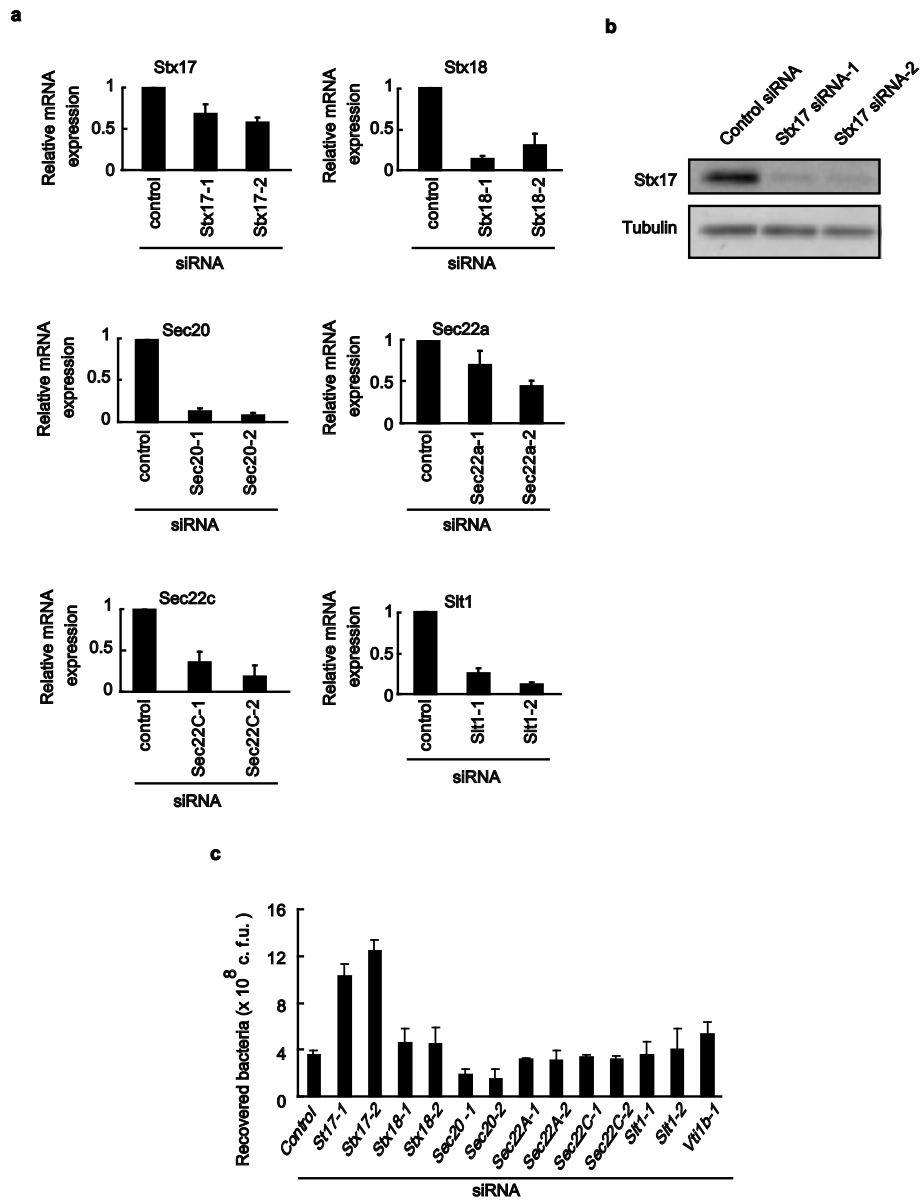

**Supplementary Figure 7 | Effects of SNARE knockdown on autophagy against invading GAS.** **a**, HeLa cells were transfected with siRNA against Stx17, Syntaxin 18, Sec20, Sec22a, Sec22c, Slit1 or a control siRNA. Real-time PCR analysis showed that the expression of these SNARE mRNA was successfully suppressed in HeLa cells. **b**, Stx17 protein expression was examined in siRNA knockdown HeLa cells by immunoblotting using antibodies against Stx17 and tubulin. **c**, HeLa cells were transfected with siRNA against various SNAREs. Cells were infected with GAS, and viable intracellular bacteria were counted in triplicate.

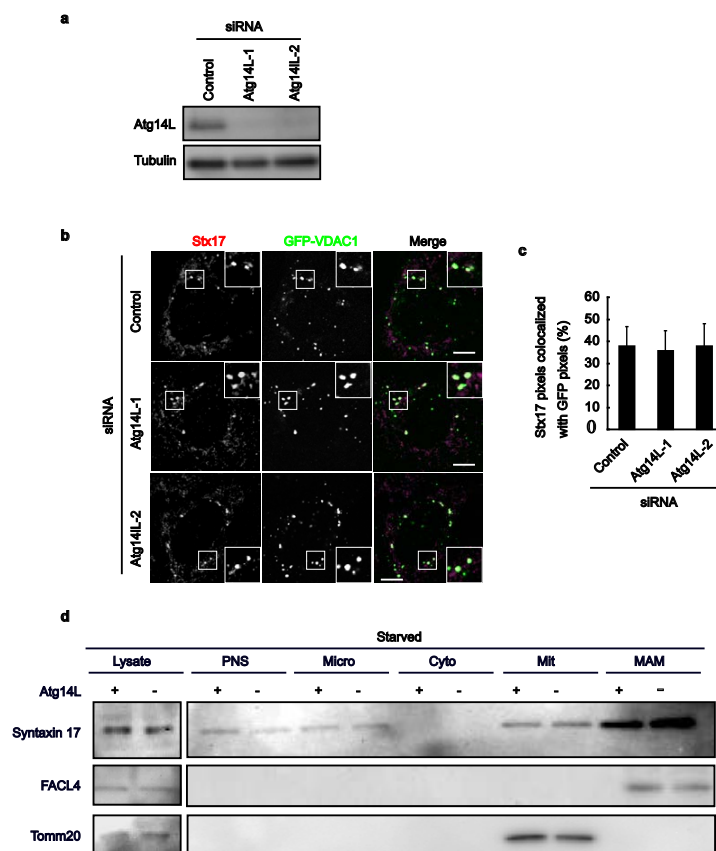

**Supplementary Figure 8 | Negligible effects of Atg14L knockdown or knockout on assembly and localization of Stx17.** **a**, Atg14L protein expression was examined in siRNA-knockdown HeLa cells by immunoblotting using antibodies against Atg14L and tubulin. **b**, Atg14L-knockdown HeLa cells expressing Cherry-VDAC1 were starved for 2 h and probed with antibodies against Stx17. **c**, Colocalization of Stx17 and GFP-VDAC1 of **b** (mean  $\pm$  SD, > 20 cells for each sample, Zeiss LSM Image Browser software). **d**, Atg14L-knockout and WT MEFs were subjected to starved conditions and probed by Western blotting using antibodies against Stx17, FACL4 and TOMM20. Scale bars, 5  $\mu$ m.



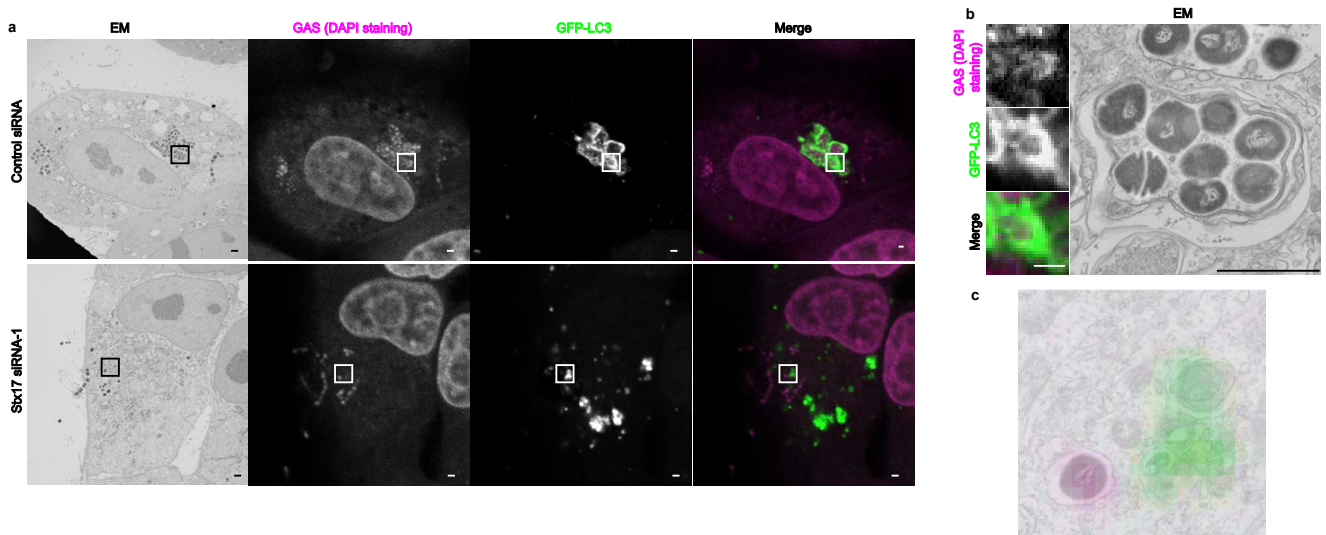

**Supplementary Figure 9 | The formation of xenophagosomes is attenuated in Stx17-knockdown cells.** **a**, HeLa cells stably expressing GFP-LC3 were transfected with siRNAs against Stx17. The cells were infected with GAS for 1 hour. DNA was stained by DAPI. **b**, Cropped image of **a**. **c**, Overlapped image of light and electron microscopy of Stx17 knockdown cell of Figure 4a. Scale bars, 5  $\mu$ m.

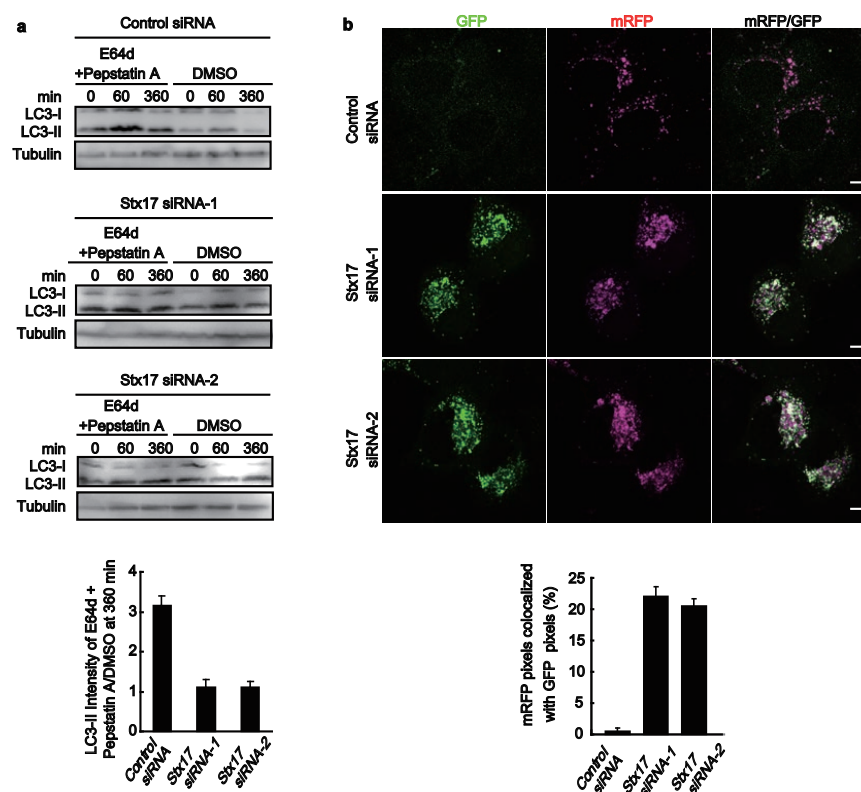

**Supplementary Figure 10 | Effects of Stx17-knockdown on autophagosome formation.** **a**, Autophagic flux was examined on Stx17-knockdown HeLa cells starved with or without proteinase inhibitors for the indicated times (min). Cell lysates were probed with antibodies against LC3 and tubulin. LC3-II protein levels gradually decreased in the control, indicating autophagic flux; lysosomal protease inhibitors (E64d and pepstatin A) prevented this degradation, with negligible effect on LC3-I. No flux-related degradation was observed in Stx17-knockdown cells. Relative intensities of LC3-II bands (inhibitor treated/control) at 360 min were measured and plotted from three independent experiments. **b**, mRFP-GFP tandem-tagged LC3 (tfLC3) was used to distinguish autophagic vacuoles; mRFP(+)GFP(+)LC3 spots represent autophagosomes and their precursors, whereas mRFP(+)GFP(-)LC3 spots indicate autolysosomes (the GFP signal is susceptible to lysosomal degradation, whereas mRFP is resistant). The puncta of both LC-3 markers were clearly merged in Stx17-knockdown cells, indicating impairment of autophagic degradation. Colocalization of mRFP with GFP signals are plotted in pixels (> 30 cells/sample) Scale bars, 5  $\mu$ m.
